# Supplementary material for: Use of public sector diabetes eye services in New Zealand 2006–2019: Analysis of national routinely collected datasets
Source: PubMed Central journal article supplement (PMC10194990; doi:10.1371/journal.pone.0285904), 2023-05-18
Supplement: pone.0285904.s001.pdf [file pone.0285904.s001.pdf]

**S1 Table: Sensitivity analysis for retinal screening attendance rate once every 3 years, New Zealand, 2006–2019**

|                                           | Total†<br>n (col%) | Attendance at retinal screening every three years |                   |         |
|-------------------------------------------|--------------------|---------------------------------------------------|-------------------|---------|
|                                           |                    | n (row%)                                          | Odds Ratio‡       | p-value |
| <b>Total</b>                              | <b>168622(100)</b> | <b>130331(77.3)</b>                               |                   |         |
| <b>Sex</b>                                |                    |                                                   |                   |         |
| Female                                    | 79588(47.2)        | 60474(76.0)                                       | Ref               |         |
| Male                                      | 89034(52.8)        | 69857(78.5)                                       | 1.1(1.07 , 1.12)  | <0.0001 |
| <b>Age (years)</b>                        |                    |                                                   |                   |         |
| 15-29                                     | 9143(5.4)          | 6732(73.6)                                        | 0.72(0.68 , 0.76) | <0.0001 |
| 30-39                                     | 18570(11.0)        | 14299(77.0)                                       | 0.87(0.83 , 0.90) | <0.0001 |
| 40-49                                     | 35514(21.1)        | 28408(80.0)                                       | 1.01(0.98 , 1.05) | 0.4930  |
| 50-59                                     | 43701(25.9)        | 35142(80.4)                                       | Ref               |         |
| 60-69                                     | 37265(22.1)        | 28820(77.3)                                       | 0.80(0.77 , 0.83) | <0.0001 |
| 70-79                                     | 20219(12.0)        | 14231(70.4)                                       | 0.53(0.51 , 0.55) | <0.0001 |
| 80+                                       | 4210(2.5)          | 2699(64.1)                                        | 0.39(0.37 , 0.42) | <0.0001 |
| <b>Ethnicity</b>                          |                    |                                                   |                   |         |
| NZ European                               | 90966(53.9)        | 71549(78.7)                                       | Ref               |         |
| Māori                                     | 24299(14.4)        | 18314(75.4)                                       | 0.76(0.74 , 0.79) | <0.0001 |
| Pacific                                   | 24151(14.3)        | 17742(73.5)                                       | 0.69(0.66 , 0.71) | <0.0001 |
| Asian                                     | 25415(15.1)        | 19998(78.7)                                       | 0.89(0.86 , 0.92) | <0.0001 |
| Others                                    | 3791(2.2)          | 2728(72.0)                                        | 0.63(0.59 , 0.68) | <0.0001 |
| <b>Area level deprivation (quintiles)</b> |                    |                                                   |                   |         |
| Least deprived                            | 23044(13.7)        | 18480(80.2)                                       | Ref               |         |
| 2                                         | 26675(15.8)        | 20857(78.2)                                       | 0.91(0.87 , 0.95) | <0.0001 |
| 3                                         | 30830(18.3)        | 23865(77.4)                                       | 0.88(0.85 , 0.92) | <0.0001 |
| 4                                         | 37772(22.4)        | 29252(77.4)                                       | 0.91(0.87 , 0.94) | <0.0001 |
| Most deprived                             | 50044(29.7)        | 37754(75.4)                                       | 0.84(0.81 , 0.88) | <0.0001 |
| Missing                                   | 257(0.2)           | 123(47.9)                                         |                   |         |

† People who had at least retinal screening appointment between 1 July 2006 and 1 January 2017, lived at least 36 months from the date of the first screening appointment and were not immediately referred to ophthalmology on the first screening attendance

‡ Logistic regression to test for an association with attendance at retinal screening every three years, adjusting for all other variables in the table.
