# Supplementary material for: Use of public sector diabetes eye services in New Zealand 2006–2019: Analysis of national routinely collected datasets
Source: PubMed Central journal article supplement (PMC10194990; doi:10.1371/journal.pone.0285904), 2023-05-18
Supplement: pone.0285904.s002.pdf [file pone.0285904.s002.pdf]

**S2 Table: Heat map of disparities in biennial screening rate by ethnicity, across District Health Boards, New Zealand 2006 – 2019**

| District Health Board          | Disparity with NZ European rate |           |           |           | NZ European rate | Reference: Total eligible population for biennial screening by ethnicity |              |              |             |              | Number of eligible individuals attending biennial screening by ethnicity |              |              |             |              |
|--------------------------------|---------------------------------|-----------|-----------|-----------|------------------|--------------------------------------------------------------------------|--------------|--------------|-------------|--------------|--------------------------------------------------------------------------|--------------|--------------|-------------|--------------|
|                                | Asian                           | Māori     | Pacific   | Others    |                  | Asian                                                                    | Māori        | Pacific      | Others      | NZ European  | Asian                                                                    | Māori        | Pacific      | Others      | NZ European  |
| Southern                       | 4                               | -5        | -7        | -6        | 74               | 418                                                                      | 992          | 385          | 144         | 11661        | 327                                                                      | 686          | 261          | 98          | 8679         |
| Waikato                        | 0                               | -6        | -6        | -8        | 73               | 1651                                                                     | 5276         | 967          | 558         | 12769        | 1207                                                                     | 3527         | 650          | 366         | 9366         |
| Counties Manukau               | 0                               | -7        | -8        | -7        | 69               | 8008                                                                     | 4702         | 12458        | 932         | 8158         | 5561                                                                     | 2950         | 7636         | 583         | 5669         |
| Auckland                       | -3                              | -8        | -9        | -12       | 69               | 6938                                                                     | 1535         | 4821         | 561         | 5702         | 4617                                                                     | 932          | 2914         | 323         | 3945         |
| Northland                      | 6                               | -2        | 0         | -12       | 69               | 226                                                                      | 4600         | 177          | 60          | 5625         | 168                                                                      | 3055         | 121          | 34          | 3872         |
| Taranaki                       | 3                               | -8        | -3        | -9        | 63               | 169                                                                      | 1116         | 85           | 80          | 5847         | 111                                                                      | 606          | 51           | 43          | 3663         |
| Waitematā                      | 2                               | -3        | -4        | -7        | 60               | 5846                                                                     | 1907         | 3541         | 684         | 11668        | 3573                                                                     | 1084         | 1972         | 359         | 6950         |
| Canterbury                     | 2                               | -4        | -1        | -7        | 57               | 1739                                                                     | 1537         | 930          | 452         | 16171        | 1040                                                                     | 821          | 525          | 227         | 9292         |
| Nelson Marlborough             | -3                              | -6        | 1         | 10        | 55               | 156                                                                      | 529          | 107          | 75          | 5708         | 81                                                                       | 262          | 60           | 49          | 3154         |
| Capital and Coast              | -1                              | -7        | -10       | -1        | 55               | 2078                                                                     | 1279         | 2060         | 416         | 6395         | 1117                                                                     | 609          | 927          | 225         | 3522         |
| South Canterbury               | 19                              | 2         | -5        | -2        | 54               | 52                                                                       | 162          | 35           | 44          | 2703         | 38                                                                       | 90           | 17           | 23          | 1455         |
| Whanganui                      | 1                               | -1        | -4        | 12        | 41               | 96                                                                       | 950          | 83           | 30          | 2640         | 41                                                                       | 382          | 31           | 16          | 1095         |
| Tairāwhiti                     | 14                              | 3         | 9         | .         | 30               | 48                                                                       | 1726         | 95           | 25          | 2143         | 21                                                                       | 559          | 37           | 7           | 636          |
| West Coast                     | .                               | 4         | .         | .         | 28               | 1                                                                        | 34           | 3            | 4           | 246          | 1                                                                        | 11           | 0            | 3           | 69           |
| <b>National</b>                | <b>2</b>                        | <b>-4</b> | <b>-4</b> | <b>-5</b> | <b>63</b>        | <b>27426</b>                                                             | <b>26345</b> | <b>25747</b> | <b>4065</b> | <b>97436</b> | <b>17903</b>                                                             | <b>15574</b> | <b>15202</b> | <b>2356</b> | <b>61367</b> |
| Median disparities across DHBs | 2                               | -5        | -4        | -7        |                  |                                                                          |              |              |             |              |                                                                          |              |              |             |              |

**Note:** Incomplete data for six District Health Boards (DHBs) (Bay of Plenty, Hawke's Bay, Lakes, Hutt Valley, Wairarapa, and Midcentral) meant these DHBs were omitted from analysis; the values displayed in the ethnicity columns are rate differences (unadjusted) from the European rate (e.g., Asian = 1% means (Asian rate [%] – European rate [%] = 1%); no values are displayed if there was fewer than 30 eligible people in an ethnicity group. Records of people where the DHB is unspecified were excluded (n=236).
