# Supplementary material for: Use of public sector diabetes eye services in New Zealand 2006–2019: Analysis of national routinely collected datasets
Source: PubMed Central journal article supplement (PMC10194990; doi:10.1371/journal.pone.0285904), 2023-05-18
Supplement: pone.0285904.s003.pdf [file pone.0285904.s003.pdf]

**S3 Table: Heat map of disparities in biennial screening rate by age group, across District Health Board, New Zealand 2006 – 2019**

| District Health Board        | Disparity with 50-59 years group |           |           |           |           |            | 50-59 age group rate | Total eligible population for biennial screening (years) |              |              |              |              |             | Number of eligible individuals attending biennial screening (years) |             |              |              |              |              |             |              |
|------------------------------|----------------------------------|-----------|-----------|-----------|-----------|------------|----------------------|----------------------------------------------------------|--------------|--------------|--------------|--------------|-------------|---------------------------------------------------------------------|-------------|--------------|--------------|--------------|--------------|-------------|--------------|
|                              | 15-29                            | 30-39     | 40-49     | 60-69     | 70-79     | 80+        |                      | 15-29                                                    | 30-39        | 40-49        | 60-69        | 70-79        | 80+         | 50-59                                                               | 15-29       | 30-39        | 40-49        | 60-69        | 70-79        | 80+         | 50-59        |
| Southern                     | -8                               | -5        | -1        | -3        | -7        | -15        | 77                   | 635                                                      | 1108         | 2370         | 3439         | 2178         | 563         | 3307                                                                | 440         | 798          | 1812         | 2566         | 1530         | 350         | 2555         |
| Waikato                      | -10                              | -6        | -3        | 1         | -3        | -11        | 74                   | 1315                                                     | 2308         | 4176         | 4651         | 2714         | 671         | 5386                                                                | 843         | 1554         | 2931         | 3474         | 1924         | 423         | 3967         |
| Northland                    | -7                               | -4        | -1        | -1        | -10       | -21        | 71                   | 472                                                      | 995          | 2153         | 2539         | 1324         | 249         | 2956                                                                | 301         | 663          | 1495         | 1774         | 806          | 124         | 2087         |
| Counties Manukau             | -11                              | -7        | -2        | -5        | -14       | -26        | 70                   | 2467                                                     | 5256         | 9166         | 5926         | 2122         | 310         | 9011                                                                | 1451        | 3273         | 6218         | 3862         | 1175         | 135         | 6285         |
| Auckland                     | -4                               | -3        | 0         | -5        | -12       | -16        | 68                   | 1236                                                     | 2471         | 4556         | 3887         | 1929         | 391         | 5087                                                                | 790         | 1614         | 3121         | 2446         | 1085         | 205         | 3470         |
| Taranaki                     | -14                              | -7        | -2        | 1         | -3        | -5         | 63                   | 230                                                      | 549          | 1177         | 1794         | 1284         | 438         | 1825                                                                | 113         | 310          | 720          | 1156         | 768          | 254         | 1153         |
| Waitematā                    | -2                               | -2        | 1         | -2        | -14       | -18        | 61                   | 1445                                                     | 2921         | 5311         | 4995         | 2507         | 441         | 6026                                                                | 860         | 1746         | 3302         | 2957         | 1179         | 190         | 3704         |
| South Canterbury             | 2                                | 3         | 0         | -3        | -26       | -44        | 61                   | 126                                                      | 218          | 472          | 817          | 528          | 86          | 749                                                                 | 79          | 139          | 285          | 471          | 181          | 14          | 454          |
| Nelson Marlborough           | -4                               | -1        | -1        | 0         | -5        | -10        | 57                   | 238                                                      | 450          | 1009         | 1692         | 1185         | 320         | 1681                                                                | 126         | 251          | 562          | 955          | 612          | 149         | 951          |
| Canterbury                   | 1                                | -1        | -3        | 3         | 4         | 4          | 56                   | 1196                                                     | 2123         | 3752         | 4837         | 3121         | 808         | 4992                                                                | 682         | 1171         | 2006         | 2880         | 1879         | 487         | 2800         |
| Capital and Coast            | -5                               | -6        | -5        | 1         | -2        | -10        | 55                   | 757                                                      | 1399         | 2652         | 2682         | 1454         | 243         | 3041                                                                | 375         | 684          | 1318         | 1492         | 761          | 109         | 1661         |
| Whanganui                    | 2                                | -5        | -2        | 4         | 1         | 1          | 41                   | 138                                                      | 335          | 666          | 888          | 594          | 141         | 1037                                                                | 59          | 121          | 261          | 398          | 245          | 59          | 422          |
| Tairāwhiti                   | 0                                | 1         | 1         | -2        | -4        | -7         | 32                   | 187                                                      | 338          | 692          | 950          | 689          | 153         | 1028                                                                | 60          | 112          | 233          | 292          | 192          | 39          | 332          |
| West Coast                   | .                                | .         | 12        | 13        | .         | .          | 20                   | 13                                                       | 29           | 59           | 65           | 16           | 3           | 103                                                                 | 6           | 10           | 19           | 22           | 5            | 1           | 21           |
| <b>National</b>              | <b>-5</b>                        | <b>-4</b> | <b>-1</b> | <b>-1</b> | <b>-8</b> | <b>-12</b> | <b>65</b>            | <b>10455</b>                                             | <b>20500</b> | <b>38211</b> | <b>39162</b> | <b>21645</b> | <b>4817</b> | <b>46229</b>                                                        | <b>6185</b> | <b>12446</b> | <b>24283</b> | <b>24745</b> | <b>12342</b> | <b>2539</b> | <b>29862</b> |
| Median disparity across DHBs | -4                               | -4        | -1        | 0         | -5        | -11        |                      |                                                          |              |              |              |              |             |                                                                     |             |              |              |              |              |             |              |

**Note:** Incomplete data for six District Health Boards (DHBs) (Bay of Plenty, Hawke's Bay, Lakes, Hutt Valley, Wairarapa, and Midcentral) meant these DHBs were omitted from analysis; the values displayed in the age group columns are rate differences (unadjusted) from the rate for those aged 50-59 years; no values are displayed if there was fewer than 30 eligible people in an age group.

Records of people where the DHB was unspecified were excluded from analysis (n=236).
