# Supplementary material for: Use of public sector diabetes eye services in New Zealand 2006–2019: Analysis of national routinely collected datasets
Source: PLoS One. 2023 May 18;18(5):e0285904. doi: 10.1371/journal.pone.0285904 (PMC10194990; doi:10.1371/journal.pone.0285904)
Supplement: S4 Table — (PDF) [file pone.0285904.s004.pdf]

**S4 Table: Heat map of the number of anti-VEGF injections in the first year of treatment (within 365 days from the date of the first dose) among people receiving anti-VEGF treatment across District Health Boards, New Zealand, 2014-2019**

| District Health Board | Injections per person in first<br>year of treatment (n) |                      |    | Total number<br>of people<br>treated | Total<br>number of<br>injections |
|-----------------------|---------------------------------------------------------|----------------------|----|--------------------------------------|----------------------------------|
|                       | Median                                                  | Inter-quartile range |    |                                      |                                  |
|                       |                                                         | Q1                   | Q3 |                                      |                                  |
| Nelson Marlborough    | 6                                                       | 3                    | 9  | 291                                  | 1773                             |
| Canterbury            | 4                                                       | 2                    | 7  | 850                                  | 3980                             |
| Waitematā             | 4                                                       | 2                    | 6  | 908                                  | 3952                             |
| Auckland              | 3                                                       | 2                    | 6  | 842                                  | 3222                             |
| Capital and Coast     | 3                                                       | 2                    | 5  | 392                                  | 1395                             |
| Counties Manukau      | 3                                                       | 1                    | 5  | 2071                                 | 7482                             |
| South Canterbury      | 3                                                       | 2                    | 5  | 133                                  | 523                              |
| Tairāwhiti            | 3                                                       | 1                    | 4  | 117                                  | 353                              |
| Taranaki              | 3                                                       | 1                    | 4  | 236                                  | 754                              |
| Waikato               | 3                                                       | 1                    | 5  | 505                                  | 1845                             |
| West Coast            | 3                                                       | 1                    | 6  | 75                                   | 304                              |
| Whanganui             | 3                                                       | 2                    | 4  | 46                                   | 137                              |
| Northland             | 2                                                       | 1                    | 5  | 308                                  | 967                              |
| Southern              | 2                                                       | 1                    | 4  | 733                                  | 2167                             |
| Unknown               | 1                                                       | 1                    | 3  | 5                                    | 9                                |
| National              | 3                                                       | 1                    | 6  | 7512                                 | 28863                            |

Note: Incomplete data for six District Health Boards (DHBs) (Bay of Plenty, Hawke's Bay, Lakes, Hutt Valley, Wairarapa, and Midcentral) meant these DHBs were omitted from analysis
